1           **Impact of COVID-19 pandemic on the etiology and characteristics of**  
2                   **community-acquired pneumonia among children requiring**  
3                           **bronchoalveolar lavage in northern China**

4   Rui-han Liu<sup>1,2¶</sup>, Yu-yan Zhang<sup>1¶</sup>, Zhou-hua Lu<sup>1</sup>, Chang-qing Shen<sup>1</sup>, Jin Wang<sup>1</sup>,  
5   Qing Zhao<sup>1</sup>, Tong-shu Hou<sup>3</sup>, Feng-hai Niu<sup>1</sup>, Qing-xia Kong<sup>1\*</sup>, Jun Ning<sup>1\*</sup>, Lei  
6   Yang<sup>1,2\*</sup>

7   <sup>1</sup>Affiliated Hospital of Jining Medical University, Jining Medical University,  
8   Jining, Shandong, China

9   <sup>2</sup>College of TCM, Shandong University of Traditional Chinese Medicine, Jinan,  
10   Shandong, China

11   <sup>3</sup>The Second Clinical Medical College, Binzhou Medical University, Yantai,  
12   Shandong, China

13   ¶These authors contributed equally to this work.

14   \* co-corresponding authors

15   **Corresponding authors**

16   E-mail: [kxdqy8@sohu.com](mailto:kxdqy8@sohu.com)(QXK)

17   E-mail: [18678766989@163.com](mailto:18678766989@163.com)(JN)

18   E-mail: [yanglei8224982@163.com](mailto:yanglei8224982@163.com)(LY)

19 **Abstract**

20 **Background:**

21 To investigate the etiology and clinical characteristics of community-acquired  
22 pneumonia (CAP) among children requiring bronchoalveolar lavage (BAL) and  
23 analyze the impact of the coronavirus disease 2019 (COVID-19) pandemic on  
24 the pathogen spectrum and clinical manifestations.

25 **Methods:**

26 Children <14 years old hospitalized with CAP requiring BLA were enrolled  
27 between February 2019 to January 2020 and August 2021 to July 2022.  
28 Multiplex reverse transcription polymerase chain reaction (mRT-PCR) was  
29 used for pathogen detection. The demographic and clinical characteristics  
30 were compared between different pathogen-type infection groups, and before  
31 and during the COVID-19 pandemic.

32 **Results:**

33 Pathogen was detected in 91.66% (1363/1487) children. *Mycoplasma*  
34 *pneumoniae*, adenovirus and human rhinovirus were the most frequently  
35 detected pathogens. The frequency of detection of virus infections and  
36 co-infections was decreased during the pandemic, but the detection of atypical  
37 bacterial infections was increased. The clinical manifestations and the results  
38 of CT scans and fiberoptic bronchoscopy showed a significant difference  
39 between different types of pathogen infection, and lung inflammation was  
40 reduced during the COVID-19 pandemic compared with before the pandemic.

41 **Conclusions:**

42 *M. pneumoniae* infection might be the greatest pediatric disease burden  
43 leading to CAP in northern China. Wearing masks and social distancing in  
44 public places during the COVID-19 pandemic effectively reduced the  
45 transmission of respiratory viruses, but it did not reduce the infection rate of *M.*  
46 *pneumoniae*. In addition, these interventions significantly reduced lung  
47 inflammation in children compared with before the pandemic.

## 48 **Introduction**

49 Community-acquired pneumonia (CAP) is a common infection that presents a  
50 serious public health threat among children under 5 years of age. CAP was  
51 responsible for 13.9% of childhood deaths among the under-5s worldwide in  
52 2019[1]. Although this was more than 1,001,000 fewer deaths compared with  
53 the year 2000, the number of complicated and severe pneumonia cases has  
54 increased considerably over the past two decades[2,3]. Following the  
55 introduction of the pneumococcal conjugate vaccine and the *Haemophilus*  
56 *influenzae* type b vaccine, respiratory viruses and atypical bacteria have  
57 become the most frequent etiologic agents in recent years[4].

58 The outbreak of coronavirus disease 2019 (COVID-19) constitutes a  
59 substantial health burden across the globe. To control the COVID-19  
60 pandemic, governments around the world implemented a series of  
61 non-pharmaceutical interventions (NPIs), such as mandated facial masks,  
62 encouraged social distancing, remote working, online teaching, stay-at-home  
63 orders and travel restrictions. Studies have shown that the preventive  
64 measures useful in containing COVID-19 also seemed to be effective in  
65 preventing the transmission of other respiratory viruses[5-11]. Considering the  
66 impact of etiology on disease severity, mortality and long-term sequelae in  
67 children with CAP[12], it is necessary to identify the causative pathogen.

68 Nasopharyngeal swabs or aspirate specimens are usually used for  
69 pathogen detection in children with CAP. However, the detection of

70 microorganisms from the upper respiratory tract may not directly correlate with  
71 the pathogenic agents of pneumonia[13]. Over the past two decades,  
72 fiberoptic bronchoscopy (FB) and bronchoalveolar lavage (BAL) have become  
73 important diagnostic and therapeutic procedures for severe pneumonia.  
74 Bronchoalveolar lavage fluid (BALF) collected directly from the foci of  
75 inflammation can be used as reliable samples for pathogen identification[14].  
76 Furthermore, advances in molecular detection technology have contributed to  
77 the rapid and accurate pathogen identification. Automated capillary  
78 electrophoresis combined with multiplex reverse transcription polymerase  
79 chain reaction (mRT-PCR) has been developed to detect microorganisms, at  
80 reasonable cost and acceptable levels of sensitivity and specificity[15].

81 In this study, we report and discuss the impact of the COVID-19 pandemic  
82 on the spectrum of common respiratory pathogens among children with CAP  
83 requiring FB plus BAL in northern China. Additionally, changes in the pathogen  
84 spectrum and the clinical manifestations in the children were analyzed  
85 systematically and compared prior to the COVID-19 pandemic (February 2019  
86 to January 2020) and during the COVID-19 pandemic (August 2021 to July  
87 2022).

## 88 **Materials and methods**

### 89 **Ethics approval**

90 This study was approved by the Ethics Committee of the Affiliated Hospital of  
91 Jining Medical University (No.: 2020C076).

## 92 **Study population**

93 Between February 2019 to January 2020 and August 2021 to July 2022, a total  
94 of 1487 children under the age of 14 who required BAL were included in our  
95 study. It was ensured by experienced physicians that the following inclusion  
96 criteria were met. (1) All of the children were in the acute stage of pneumonia.  
97 (2) Symptoms persisted for at least 7 days after the initiation of treatment  
98 and/or the patient was not responding to treatment, or breathing was labored,  
99 or the child became distressed or agitated, or their oxygen saturation level was  
100 < 92%. (3) Auscultation revealed decreased/absent breath sounds, or tubular  
101 breath sounds, and or a repeated fixed wheeze. (4) Radiographic inspection  
102 revealed pulmonary atelectasis, or pulmonary emphysema, or mediastinal  
103 emphysema, or pulmonary consolidation. Exclusion criteria were as follows:  
104 children with immunodeficiency disease, congenital heart disease,  
105 tracheostomy tube, cystic fibrosis, hemopoietic system malignant tumor,  
106 recent hematopoietic stem-cell or solid-organ transplant, children with an  
107 alternative respiratory disorder diagnosis or newborns less than 1 month old.  
108 Written informed consent was obtained from parents/guardians before children  
109 underwent FB plus BAL.

## 110 **Sample and data collection**

111 For the purpose of treatment, FB combined with BAL was performed by  
112 experienced bronchoscopists according to the recommendation of the  
113 European Respiratory Society Task Force[16]. Approximately 3 mL of BALF

114 was collected from each patient and the samples were aliquoted and stored at  
115 -80°C within 2 hours simultaneously. Diagnosis of the morphology under  
116 bronchoscopy was made by two experienced physicians[17,18].

117 The presence of pulmonary consolidation, infiltration, pleural effusion and  
118 pericardial effusion in the CT scans was considered evidence of  
119 pneumonia[19]. The CT scans were reviewed by three senior radiologists  
120 independently to ensure the accuracy and consistency of the diagnosis. The  
121 other clinical data were extracted from electronic medical records after the  
122 patient was discharged.

### 123 **Pathogen detection**

124 The SureX 13 respiratory pathogen multiplex kit (Ningbo Health Gene  
125 Technologies Ltd.) was used to simultaneously detect common virus and  
126 atypical bacteria in 200 µL of BALF. The mRT-PCR products were analyzed on  
127 the Applied Biosystems 3500Dx Genetic Analyzer with LIZ500 as the internal  
128 standard, and then analyzed with GeneMapper 4.1 software (Thermo Fisher  
129 Scientific, Waltham, MA, USA).

130 A viral or atypical bacterial pathogen was considered to be present if  
131 influenza A virus (Flu A, including 2009 H1N1 pandemic and H3N2), influenza  
132 B virus (Flu B), parainfluenza virus (PIV), adenovirus (AdV), respiratory  
133 syncytial virus (RSV), human rhinovirus (HRV), human metapneumovirus  
134 (hMPV), human bocavirus (HBoV), coronavirus (CoV), *Mycoplasma*  
135 *pneumoniae* or *Chlamydomphila pneumoniae* was detected in the BALF.

136 Co-infection was considered when two or more viral or atypical bacterial  
137 pathogens were detected in one child.

### 138 **Statistical analysis**

139 Considering the similar clinical features observed between children with  
140 virus–virus co-infections and single virus infections, these cases were  
141 combined into the virus group in the tables. This also applied to those with one  
142 or two atypical bacterial infections, who were combined in the atypical  
143 bacterium group. The clinical characteristics of enrolled children were stratified  
144 and described according to the following groups: virus or atypical bacterium  
145 only infection, and co-infection (virus–atypical bacterium infections).

146 All statistical analyses were performed using SAS software, version 9.4  
147 (SAS Institute Inc., NC, USA). The median and quartile [M (P25, P75)] values  
148 were used to describe quantitative data with a non-normal distribution, and the  
149 frequency (component ratio) [n (%)] was used to describe classified data. The  
150 Chi-squared test was used to analyze differences in sex, age, the season of  
151 disease onset and the infecting pathogens between samples collected before  
152 and during the COVID-19 pandemic. The Kruskal–Wallis H test was used to  
153 compare the time from illness onset to admission, the duration of  
154 hospitalization, and the presence of a fever and cough in different groups  
155 between different time periods. Fisher's exact test was used to compare the  
156 difference in the proportion of different pathogens between samples taken  
157 before and during the COVID-19 pandemic. Trends in the infection rates of



158 various pathogens in different age groups were assessed by the  
159 Cochran–Armitage trend test. The differences in clinical manifestations, CT  
160 scans and FB results between the various groups and different time periods  
161 were also analyzed by Fisher's exact test. A probability (p) value less than 0.05  
162 was considered statistically significant. For pairwise comparison of multiple  
163 groups of samples, Bonferroni correction was used to inspect the standard of  
164 each comparison,  $\alpha' = 0.01667$  (0.05/3).

## 165 **Results**

### 166 **Demographic characteristics**

167 From February 2019 to January 2020 and August 2021 to July 2022, 696 and  
168 791 children were enrolled in this study, respectively (Table 1). A total of  
169 54.74% of the children were boys, and the median age was  $70.51 \pm 32.79$   
170 months. The median time from illness onset to admission and the median  
171 duration of hospitalization were 8 (6,10) days and 7 (6,9) days, respectively.  
172 The proportion of children undergoing FB combined with BAL gradually  
173 increased with age ( $\chi^2/Z=54.0288$ ,  $P<0.001$ ), and the proportion of children  
174 affected during autumn was significantly higher than that in the other seasons.

175 Compared with before the COVID-19 pandemic, the median time from  
176 illness onset to hospitalization was reduced [8 (6,11) days vs 7 (6,10) days;  
177  $P=0.0031$ ] and the median hospitalization time was also reduced [8 (7,9) days  
178 vs 7 (6,8) days;  $P<0.001$ ] in the children enrolled during the COVID-19  
179 pandemic. During the COVID-19 pandemic, the pathogen detection rate

180 **Table 1 Demographic characteristics of children with community-acquired pneumonia requiring Flexible bronchoscopy and bronchoalveolar lavage**

| <b>Variables</b>                                                         | <b>Total</b> | <b>Before</b> | <b>Ongoing</b> | <b>X<sup>2</sup>/Z</b> | <b>P</b> |
|--------------------------------------------------------------------------|--------------|---------------|----------------|------------------------|----------|
| <b>Number</b>                                                            | <b>1487</b>  | <b>696</b>    | <b>791</b>     | -                      | -        |
| Sex (male), No. (%) <sup>a</sup>                                         | 814(54.74)   | 385(55.32)    | 429(54.24)     | 0.1746                 | 0.676    |
| Time from illness onset to admission (days), mean(P25, P75) <sup>b</sup> | 8(6,10)      | 8(6,11)       | 7(6,10)        | 8.748                  | 0.0031   |
| Duration of hospitalization (days), mean(P25, P75) <sup>b</sup>          | 7(6,9)       | 8(7,9)        | 7(6,8)         | 48.1227                | <0.001   |
| <b>Age (mo), mean ± SD <sup>a</sup></b>                                  | 70.51±32.79  | 64.41±32.43   | 75.87±32.19    |                        |          |
| age < 3 yrs, No. (%)                                                     | 229(15.40)   | 149(21.41)    | 80(10.11)      | 54.0288                | <0.001   |
| 3 yrs. ≤ age < 5 yrs, No. (%)                                            | 357(24.01)   | 170(24.43)    | 187(23.64)     |                        |          |
| 5 yrs. ≤ age < 7 yrs, No. (%)                                            | 427(28.72)   | 207(29.74)    | 220(27.81)     |                        |          |
| 7 yrs. ≤ age < 14 yrs, No. (%)                                           | 474(31.88)   | 170(24.43)    | 304(38.43)     |                        |          |
| <b>Incident season, No. (%) <sup>a</sup></b>                             |              |               |                |                        |          |
| Spring (Mar, Apr, May)                                                   | 170 (11.43)  | 116(16.67)    | 54(6.83)       | 40.2873                | <0.001   |
| Summer (Jun, Jul, Aug)                                                   | 237 (15.94)  | 89(12.79)     | 148(18.71)     |                        |          |
| Fall (Sep, Oct, Nov)                                                     | 640(43.04)   | 291(41.81)    | 349(44.12)     |                        |          |
| Winter (Dec, Jan, Feb)                                                   | 440(29.59)   | 200(28.74)    | 240(30.34)     |                        |          |

181 Data are no. (%) of children, unless otherwise indicated. Percentages were calculated using the number of children with available data, rather than the total  
 182 number.

183 a. Chi-square test was used to analyze the differences in gender, age and onset seasons between before COVID-19 pandemic and during COVID-19

184 pandemic.

185 **b.** Kruskal-Wallis H Test was used to compare the time from illness onset to admission and duration of hospitalization in different groups between different

186 period.

187 decreased from 20% to ~10% in children under 3 years of age and increased  
188 from 25% up to ~40% in children aged over 7 years. There was also a  
189 statistical difference in the season of illness onset among the children  
190 ( $\chi^2/Z=40.2873$ ,  $P<0.001$ ), with a lower incidence of disease in spring (16.67%  
191 vs 6.83%) and a higher incidence in summer (12.79% vs 18.71%) during the  
192 COVID-19 pandemic (Table 1).

### 193 **Pathogen spectrum**

194 Among the enrolled children,  $\geq 1$  pathogen was detected in 91.66% (1363/1487)  
195 of children and the pathogen detection rate gradually increasing with age  
196 ( $Z=-6.425$ ,  $P<0.001$ ). The specific pathogens detected are listed in Table 2,  
197 sorted by descending detection rates. AdV (n=64, 4.30%), HRV (n=41, 2.76%),  
198 PIV (n=21, 1.41%) and Flu B (n=21, 1.41%) were the most common viral  
199 pathogens among the enrolled cases. There were statistically significant  
200 differences in the age of children infected with viruses, with the number of  
201 children infected with viruses decreasing with increased age, except for Flu B  
202 ( $P=0.1927$ ) and hMPV ( $P=0.1447$ ). Children younger than 3 years were more  
203 vulnerable to AdV, PIV and RSV infection, whereas children older than 3 years  
204 were more susceptible to atypical bacterial infection. A total of 1254 (84.33%)  
205 cases were found to be infected with *M. pneumoniae*, and the number of  
206 children with *M. pneumoniae* infection increased with age ( $Z=-10.2742$ ,  
207  $P<0.001$ ).

208 Compared with before the COVID-19 pandemic, the number of children

**Table 2 Prevalence of causative respiratory pathogen according to age groups in children performed with FOB combined with BAL**

| <b>Pathogen Detected</b>        | <b>Total<br/>No. (%)</b> | <b>&lt; 3 years<br/>No. (%)</b> | <b>3–5 years<br/>No. (%)</b> | <b>5–7 years<br/>No. (%)</b> | <b>7–14 years<br/>No. (%)</b> | <b>Z</b> | <b>p</b> |
|---------------------------------|--------------------------|---------------------------------|------------------------------|------------------------------|-------------------------------|----------|----------|
| <b>Participants, n</b>          | <b>1487</b>              | <b>229</b>                      | <b>357</b>                   | <b>427</b>                   | <b>474</b>                    | -        | -        |
| ≥1 pathogen detected            | 1363(91.66)              | 186(81.22)                      | 319(89.36)                   | 407(95.32)                   | 451(95.15)                    | -6.425   | <0.001   |
| <b>Virus</b>                    |                          |                                 |                              |                              |                               |          |          |
| AdV <sup>a</sup>                | 64(4.30)                 | 19(8.30)                        | 25(7.00)                     | 13(3.04)                     | 7(1.48)                       | 4.9844   | <0.001   |
| HRV <sup>a</sup>                | 41(2.76)                 | 10(4.37)                        | 11(3.08)                     | 11(2.58)                     | 9(1.90)                       | 1.8833   | 0.0298   |
| PIV <sup>a</sup>                | 21(1.41)                 | 12(5.24)                        | 5(1.40)                      | 2(0.47)                      | 2(0.42)                       | 4.6023   | <0.001   |
| Flu B                           | 21(1.41)                 | 5(2.18)                         | 2(0.56)                      | 11(2.58)                     | 3(0.63)                       | 0.8681   | 0.1927   |
| RSV <sup>a</sup>                | 19(1.28)                 | 11(4.80)                        | 2(0.56)                      | 4(0.94)                      | 2(0.42)                       | 3.8454   | <0.001   |
| Flu A <sup>a</sup>              | 10(0.67)                 | 6(2.62)                         | 2(0.56)                      | 0(0.00)                      | 2(0.42)                       | 2.9073   | 0.0018   |
| HBoV <sup>a</sup>               | 8(0.54)                  | 5(2.18)                         | 1(0.28)                      | 1(0.23)                      | 1(0.21)                       | 2.7325   | 0.0031   |
| hMPV                            | 8(0.54)                  | 2(0.87)                         | 2(0.56)                      | 3(0.7)                       | 1(0.21)                       | 1.0593   | 0.1447   |
| CoV <sup>a</sup>                | 2(0.13)                  | 1(0.44)                         | 1(0.28)                      | 0(0.00)                      | 0(0.00)                       | 1.6974   | 0.0448   |
| <b>Atypical bacteria</b>        |                          |                                 |                              |                              |                               |          |          |
| <i>M.pneumonia</i> <sup>a</sup> | 1254(84.33)              | 142(62.01)                      | 291(81.51)                   | 381(89.23)                   | 440(92.83)                    | -10.2742 | <0.001   |
| <i>C.pneumoniae</i>             | 4(0.27)                  | 1(0.44)                         | 0(0.00)                      | 1(0.23)                      | 2(0.42)                       | -0.4335  | 0.3323   |

210 Data are no. (%) of children, unless otherwise indicated. Percentages were calculated using the number of children with available data, rather than the total  
 211 number.

212 <sup>a</sup> $p < 0.05$ , Cochran-Armitage Trend Test was used to compare trends of infection rates of various pathogens in different age groups.

**Table 3 Distribution of various pathogens in children patients performed with FOB combined with BAL**

| Pathogen Detected                | Total, No. (%) | Before, No. (%) | Ongoing, No. (%) |                        |          |
|----------------------------------|----------------|-----------------|------------------|------------------------|----------|
| <b>Participants, n</b>           | <b>1487</b>    | <b>696</b>      | <b>791</b>       | <b>X<sup>2</sup>/Z</b> | <b>p</b> |
| Virus                            | 107(7.20)      | 69(9.91)        | 38(4.80)         | 28.1146                | <0.001   |
| Atypical bacteria                | 1177(79.15)    | 515(73.99)      | 662(83.69)       |                        |          |
| Co-infection                     | 79(5.31)       | 51(7.33)        | 28(3.54)         |                        |          |
| No pathogenic detected           | 124(8.34)      | 61(8.76)        | 63(7.96)         |                        |          |
| <b>Virus</b>                     |                |                 |                  | <b>p</b>               |          |
| AdV <sup>a</sup>                 | 64(4.30)       | 40(5.75)        | 24(3.03)         | 0.0105                 |          |
| HRV <sup>a</sup>                 | 41(2.76)       | 29(4.17)        | 12(1.52)         | 0.0022                 |          |
| PIV                              | 21(1.41)       | 13(1.87)        | 8(1.01)          | 0.1894                 |          |
| Flu B <sup>a</sup>               | 21(1.41)       | 15(2.16)        | 6(0.76)          | 0.0271                 |          |
| RSV                              | 19(1.28)       | 8(1.15)         | 11(1.39)         | 0.8182                 |          |
| Flu A <sup>a</sup>               | 10(0.67)       | 10(1.44)        | 0(0.00)          | 0.0005                 |          |
| HBoV <sup>a</sup>                | 8(0.54)        | 7(1.01)         | 1(0.13)          | 0.0293                 |          |
| hMPV                             | 8(0.54)        | 3(0.43)         | 5(0.63)          | 0.7303                 |          |
| CoV                              | 2(0.13)        | 2(0.29)         | 0(0.00)          | 0.2189                 |          |
| <b>Atypical bacteria</b>         |                |                 |                  | <b>p</b>               |          |
| <i>M.pneumonia</i> <sup>a</sup>  | 1254(84.33)    | 564(81.03)      | 690(87.23)       | 0.0013                 |          |
| <i>C.pneumoniae</i> <sup>a</sup> | 4(0.27)        | 4(0.57)         | 0(0.00)          | 0.0478                 |          |

214 Data are no. (%) of children, unless otherwise indicated. Percentages were calculated using the number of children with available data, rather than the number.

215 <sup>a</sup> $p < 0.05$ , Fisher's Exact Test was used to compare the differences between alone and co-infection of each pathogen in different period.

216 infected with AdV (5.75% vs 3.03%,  $P=0.0105$ ), HRV (4.17% vs 1.52%,  
217  $P=0.0022$ ), Flu B (2.16% vs 0.76%,  $P=0.0271$ ), Flu A (1.44% vs 0.00%,  
218  $P=0.0005$ ) and HBoV (1.01% vs 0.13%,  $P=0.0293$ ) decreased significantly.  
219 Therefore, the total proportion of cases of viral infection (9.91% vs 4.80%) and  
220 co-infection (7.33% vs 3.54%) decreased significantly. Whereas the proportion  
221 of cases of *M. pneumoniae* infection had a further increasing that compared  
222 with before the pandemic (87.23% vs 81.03%,  $P=0.0013$ ) (Table 3).

### 223 **Clinical characteristics between three infection groups**

224 Children with viral infection showed the shortest duration of fever [4 (0,6) days],  
225 while those with atypical bacterial infection [7 (5,9) days vs 4 (0,6) days,  
226  $P<0.001$ ] or co-infection [7 (4,10) days vs 4 (0,6) days,  $P=0.0002$ ] showed  
227 longer duration of fever, and the differences among the three groups were  
228 statistically significant ( $P<0.001$ ). The incidence of wheezing in children  
229 infected with virus (18.69% vs 3.91%,  $P<0.001$ ) and those with co-infection  
230 (15.19% vs 3.91%,  $P=0.0001$ ) was significantly higher than in those with  
231 atypical bacterial infection (3.91%). Compared with the atypical bacterial  
232 infection group, viral infection made children more prone to dyspnea (8.41% vs  
233 1.44%,  $P=0.0001$ ), diarrhea (15.89% vs 6.73%,  $P=0.0019$ ), rhonchi (47.66%  
234 vs 28.63%,  $P=0.0003$ ) and chest indrawing (9.35% vs 1.7%,  $P=0.0001$ ).  
235 Decreased breath sounds (59.64%) and rales (66.10%) were the most  
236 common signs in the atypical bacterial infection group. No remarkable  
237 differences in the duration of cough, fatigue, lack of appetite, abdominal pain,

**Table 4 Comparison of clinical and laboratory findings according to respiratory pathogens in children performed with FOB combined with BAL**

| Characteristic                                | Total<br>N=1363 | Virus <sup>1</sup><br>N=107 | Atypical<br>Bacteria <sup>2</sup><br>N=1177 | Co-infection <sup>3</sup><br>N=79 | P value | P value<br><sup>c</sup> (1-2) | P value<br><sup>c</sup> (1-3) | P value <sup>c</sup><br>(2-3) |  |
|-----------------------------------------------|-----------------|-----------------------------|---------------------------------------------|-----------------------------------|---------|-------------------------------|-------------------------------|-------------------------------|--|
| <b>Clinical data</b>                          |                 |                             |                                             |                                   |         |                               |                               |                               |  |
| Duration of fever,mean(P25, P75) <sup>a</sup> | 7(5,8)          | 4(0,6)                      | 7(5,9)                                      | 7(4,10)                           | <0.001  | <0.001                        | 0.0002                        | 0.7161                        |  |
| Duration of cough,mean(P25, P75) <sup>a</sup> | 7(5,9)          | 6(4,13)                     | 7(5,9)                                      | 8(5,11)                           | 0.3451  | 0.5847                        | 0.8112                        | 0.1543                        |  |
| Fatigue <sup>b</sup>                          | 17(1.25)        | 3(2.80)                     | 12(1.02)                                    | 2(2.53)                           | 0.1035  | 0.1228                        | 1                             | 0.2184                        |  |
| Dyspnea <sup>b</sup>                          | 29(2.13)        | 9(8.41)                     | 17(1.44)                                    | 3(3.80)                           | 0.0001  | 0.0001                        | 0.2422                        | 0.1262                        |  |
| Wheezing <sup>b</sup>                         | 78(5.72)        | 20(18.69)                   | 46(3.91)                                    | 12(15.19)                         | <0.001  | <0.001                        | 0.5621                        | 0.0001                        |  |
| Lack of appetite <sup>b</sup>                 | 830(60.9)       | 66(61.68)                   | 719(61.09)                                  | 45(56.96)                         | 0.7557  | 1                             | 0.5476                        | 0.4769                        |  |
| Abdominal pain <sup>b</sup>                   | 227(16.65)      | 15(14.02)                   | 201(17.08)                                  | 11(13.92)                         | 0.6354  | 0.5000                        | 1                             | 0.5375                        |  |
| Diarrhea <sup>b</sup>                         | 100(7.34)       | 17(15.89)                   | 75(6.37)                                    | 8(10.13)                          | 0.0019  | 0.0012                        | 0.2845                        | 0.2356                        |  |
| Chest pain <sup>b</sup>                       | 40(2.93)        | 4(3.74)                     | 33(2.80)                                    | 3(3.80)                           | 0.5852  | 0.5424                        | 1                             | 0.4907                        |  |
| <b>Physical sign</b>                          |                 |                             |                                             |                                   |         |                               |                               |                               |  |
| Decreased breath sounds <sup>b</sup>          | 770(56.49)      | 35(32.71)                   | 702(59.64)                                  | 33(41.77)                         | <0.001  | <0.001                        | 0.2208                        | 0.0021                        |  |
| Rales <sup>b</sup>                            | 887(65.08)      | 60(56.07)                   | 778(66.10)                                  | 49(62.03)                         | 0.0957  | 0.0436                        | 0.4535                        | 0.4640                        |  |
| Rhonchi <sup>b</sup>                          | 415(30.45)      | 51(47.66)                   | 337(28.63)                                  | 27(34.18)                         | 0.0003  | <0.001                        | 0.0727                        | 0.3062                        |  |



|                                |                                                  |             |           |            |           |        |        |        |        |
|--------------------------------|--------------------------------------------------|-------------|-----------|------------|-----------|--------|--------|--------|--------|
|                                | Tachypnea <sup>b</sup>                           | 47(3.45)    | 5(4.67)   | 39(3.31)   | 3(3.80)   | 0.571  | 0.4065 | 1      | 0.744  |
|                                | Chest indrawing <sup>b</sup>                     | 33(2.42)    | 10(9.35)  | 20(1.70)   | 3(3.80)   | 0.0001 | <0.001 | 0.2437 | 0.1718 |
| <b>CT scan</b>                 |                                                  |             |           |            |           |        |        |        |        |
|                                | Consolidation <sup>b</sup>                       | 1034(75.86) | 60(56.07) | 926(78.67) | 48(60.76) | <0.001 | <0.001 | 0.5505 | 0.0007 |
|                                | Single lobar infiltrate <sup>b</sup>             | 519(38.08)  | 30(28.04) | 465(39.51) | 24(30.38) | 0.0222 | 0.0222 | 0.7462 | 0.1215 |
|                                | Multilobar infiltrates (unilateral) <sup>b</sup> | 377(27.66)  | 19(17.76) | 333(28.29) | 25(31.65) | 0.0408 | 0.0177 | 0.0359 | 0.5214 |
|                                | Multilobar infiltrates (bilateral) <sup>b</sup>  | 436(31.99)  | 50(46.73) | 358(30.42) | 28(35.44) | 0.0024 | 0.0007 | 0.135  | 0.3781 |
|                                | Pleural effusion <sup>b</sup>                    | 236(17.31)  | 13(12.15) | 211(17.93) | 12(15.19) | 0.2979 | 0.1445 | 0.6644 | 0.6486 |
|                                | Pericardial effusion <sup>b</sup>                | 37(2.71)    | 4(3.74)   | 29(2.46)   | 4(5.06)   | 0.2135 | 0.3478 | 0.7244 | 0.1485 |
| <b>Fiberoptic bronchoscopy</b> |                                                  |             |           |            |           |        |        |        |        |
|                                | Mucosal hyperemia and/or edema <sup>b</sup>      | 820(60.16)  | 69(64.49) | 714(60.66) | 37(46.84) | 0.0348 | 0.4699 | 0.0174 | 0.0176 |
|                                | Mucosal erosion and/or necrosis <sup>b</sup>     | 543(39.84)  | 38(35.51) | 463(39.34) | 42(53.16) | 0.0348 | 0.4699 | 0.0174 | 0.0176 |
|                                | Bronchial mucus plugs <sup>b</sup>               | 224(16.43)  | 2(1.87)   | 214(18.18) | 8(10.13)  | <0.001 | <0.001 | 0.0193 | 0.0919 |
|                                | Plastic bronchitis <sup>b</sup>                  | 171(12.55)  | 2(1.87)   | 162(13.76) | 7(8.86)   | 0.0002 | <0.001 | 0.0382 | 0.3048 |
|                                | Bronchial atresia <sup>b</sup>                   | 23(1.69)    | 6(5.61)   | 14(1.19)   | 3(3.80)   | 0.0023 | 0.0043 | 0.7352 | 0.0861 |
|                                | Bronchiectasis <sup>b</sup>                      | 11(0.81)    | 5(4.67)   | 5(0.42)    | 1(1.27)   | 0.0006 | 0.0007 | 0.2433 | 0.3233 |

239 Group 1, Virus alone infection; group 2, Atypical Bacteria alone infection; group 3, Virus-Atypical bacteria co-infection.

- 240 a. Kruskal-Wallis H tests were conducted to compare groups.
- 241 b. Fisher exact tests were conducted to compare groups.
- 242 c. Bonferroni correction was conducted to pairwise comparison of multiple groups of samples.

243 chest pain and tachypnea were observed between the three groups (Table 4).

244 In CT scan findings, both consolidation and infiltration revealed prominent  
245 differences among the different infection groups. Atypical bacterial infection  
246 was most likely to cause consolidation ( $P < 0.001$ ) and single lobar infiltration  
247 ( $P = 0.0222$ ). Compared with the atypical bacterial infection group, the virus  
248 infection group was more likely to lead to bilateral multilobar infiltration  
249 (46.73% vs 30.42%,  $P = 0.0007$ ), whereas unilateral multilobar infiltration was  
250 more common in the atypical bacterial infection group than in the virus  
251 infection group (28.29% vs 17.76%,  $P = 0.0177$ ) or the co-infection group  
252 (31.65% vs 17.76%,  $P = 0.0359$ ) (Table 4).

253 The FB findings showed that compared with the viral infection and atypical  
254 bacterial infection groups, the co-infection group presented more severe  
255 tracheal mucosal injury. The proportion of more severe mucosal erosion  
256 and/or necrosis was the highest in co-infection group (53.16% vs 35.51%,  
257  $P = 0.0174$ ; 53.16% vs 39.34%,  $P = 0.0176$ ). Compared with the viral infection  
258 group, bronchial mucus plugs and plastic bronchitis were more frequently  
259 detected in children with atypical bacterial infections (18.18% vs 1.87%,  
260  $P < 0.001$ ) and co-infections (10.13% vs 1.87%,  $P = 0.0193$ ). Compared with the  
261 atypical bacterial infection group, virus infection was more likely to give rise to  
262 alterations in bronchial lumen morphology, which included bronchial atresia  
263 (5.61% vs 1.19%,  $P = 0.0043$ ) and bronchiectasis (4.67% vs 0.42%,  $P = 0.0007$ )  
264 (Table 4).

265 **Clinical characteristics before and during the COVID-19 pandemic**

266 Compared with before the COVID-19 pandemic, clinical symptoms and  
267 pulmonary signs in the enrolled children during the pandemic showed a shorter  
268 duration of cough [7 (5,10) days vs 6 (4,9) days;  $P<0.001$ ], a decreased  
269 proportion of rhonchi dyspnea (38.11% vs 23.76%,  $P<0.001$ ) and chest  
270 indrawing (3.46% vs 1.51%,  $P=0.0216$ ), but an increased proportion of chest  
271 pain (1.89% vs 3.85%,  $P=0.0364$ ), decreased breath sounds (47.87% vs  
272 64.01%,  $P<0.001$ ) and rales (49.92% vs 78.30%,  $P<0.001$ ). CT scans  
273 revealed that the proportions of consolidation (91.76% vs 57.64%,  $P<0.001$ )  
274 and unilateral multilobar infiltrates (32.55% vs 22.05%,  $P<0.001$ ) were higher  
275 than before the COVID-19 pandemic, but the proportions of bilateral multilobar  
276 infiltrates (28.57% vs 35.91%,  $P=0.0043$ ) and pleural effusion (13.74% vs  
277 21.42%,  $P=0.0002$ ) were lower than before the COVID-19 pandemic. The FB  
278 findings revealed an increased proportion of mucosal hyperemia and/or edema  
279 (27.09% vs 89.01%,  $P<0.001$ ), which corresponded to the decreased  
280 proportion of mucosal erosion and/or necrosis (72.91% vs 10.99%,  $P<0.001$ ).  
281 Despite a significant increase in the proportion of bronchial mucus plugs  
282 (13.70% vs 18.82%,  $P=0.0126$ ), there was a significant reduction in bronchial  
283 atresia (3.31% vs 0.27%,  $P<0.001$ ) and bronchiectasis (1.57% vs 0.14%,  
284  $P=0.0039$ ). The above results suggest that lung inflammation in the enrolled  
285 children was significantly alleviated compared with before the COVID-19  
286 pandemic (Table 5).

**Table5 Comparison of clinical and laboratory findings before and during COVID-19 pandemic in children performed with FOB combined with BAL**

| Characteristic                                | Total<br>n=1363 | Before<br>n=635 | Ongoing<br>n=728 | P value |
|-----------------------------------------------|-----------------|-----------------|------------------|---------|
| <b>Clinical data</b>                          |                 |                 |                  |         |
| Duration of fever,mean(P25, P75) <sup>a</sup> | 7(5,8)          | 7(5,9)          | 7(5,8)           | 0.4202  |
| Duration of cough,mean(P25, P75) <sup>a</sup> | 7(5,9)          | 7(5,10)         | 6(4,9)           | <0.001  |
| Fatigue <sup>b</sup>                          | 17(1.25)        | 10(1.57)        | 7(0.96)          | 0.337   |
| Dyspnea <sup>b</sup>                          | 29(2.13)        | 19(2.99)        | 10(1.37)         | 0.0581  |
| Wheezing <sup>b</sup>                         | 78(5.72)        | 41(6.46)        | 37(5.08)         | 0.2941  |
| Lack of appetite <sup>b</sup>                 | 830(60.9)       | 379(59.69)      | 451(61.95)       | 0.4043  |
| Abdominal pain <sup>b</sup>                   | 227(16.65)      | 98(15.43)       | 129(17.72)       | 0.2747  |
| Diarrhea <sup>b</sup>                         | 100(7.34)       | 50(7.87)        | 50(6.87)         | 0.5323  |
| Chest pain <sup>b</sup>                       | 40(2.93)        | 12(1.89)        | 28(3.85)         | 0.0364  |
| <b>Physical sign</b>                          |                 |                 |                  |         |
| Decreased breath sounds <sup>b</sup>          | 770(56.49)      | 304(47.87)      | 466(64.01)       | <0.001  |
| Rales <sup>b</sup>                            | 887(65.08)      | 317(49.92)      | 570(78.30)       | <0.001  |
| Rhonchi <sup>b</sup>                          | 415(30.45)      | 242(38.11)      | 173(23.76)       | <0.001  |

|                                                  |             |            |            |        |
|--------------------------------------------------|-------------|------------|------------|--------|
| Tachypnea <sup>b</sup>                           | 47(3.45)    | 19(2.99)   | 28(3.85)   | 0.4576 |
| Chest indrawing <sup>b</sup>                     | 33(2.42)    | 22(3.46)   | 11(1.51)   | 0.0216 |
| <b>CT scan</b>                                   |             |            |            |        |
| Consolidation <sup>b</sup>                       | 1034(75.86) | 366(57.64) | 668(91.76) | <0.001 |
| Single lobar infiltrate <sup>b</sup>             | 519(38.08)  | 245(38.58) | 274(37.64) | 0.7374 |
| Multilobar infiltrates (unilateral) <sup>b</sup> | 377(27.66)  | 140(22.05) | 237(32.55) | <0.001 |
| Multilobar infiltrates (bilateral) <sup>b</sup>  | 436(31.99)  | 228(35.91) | 208(28.57) | 0.0043 |
| Pleural effusion <sup>b</sup>                    | 236(17.31)  | 136(21.42) | 100(13.74) | 0.0002 |
| Pericardial effusion <sup>b</sup>                | 37(2.71)    | 15(2.36)   | 22(3.02)   | 0.5065 |
| <b>Fiberoptic bronchoscopy</b>                   |             |            |            |        |
| Mucosal hyperemia and/or edema <sup>b</sup>      | 820(60.16)  | 172(27.09) | 648(89.01) | <0.001 |
| Mucosal erosion and/or necrosis <sup>b</sup>     | 543(39.84)  | 463(72.91) | 80(10.99)  | <0.001 |
| Bronchial mucus plugs <sup>b</sup>               | 224(16.43)  | 87(13.70)  | 137(18.82) | 0.0126 |
| Plastic bronchitis <sup>b</sup>                  | 171(12.55)  | 86(13.54)  | 85(11.68)  | 0.3255 |
| Bronchial atresia <sup>b</sup>                   | 23(1.69)    | 21(3.31)   | 2(0.27)    | <0.001 |
| Bronchiectasis <sup>b</sup>                      | 11(0.81)    | 10(1.57)   | 1(0.14)    | 0.0039 |

288 Data are no. (%) of children, unless otherwise indicated. Percentages were calculated using the number of children with available data, rather than the number.

289 a. Kruskal-Wallis H tests were conducted to compare groups.

290 b. Fisher exact tests were conducted to compare groups.

## 291 Discussion

292 Respiratory pathogen detection in nasopharyngeal swabs, oropharyngeal  
293 swabs and even endotracheal aspirates may not fully represent the etiology of  
294 pneumonia[20]. Thus, most children with CAP may not receive treatment  
295 based on a reliable etiological diagnosis. Furthermore, the pathogen spectrum  
296 of respiratory tract infections is affected by age, geography, and environmental,  
297 social, economic and other factors. It is therefore necessary to definitively  
298 address the spectrum of respiratory pathogens involved in pediatric CAP. The  
299 aim of this study was to evaluate the etiologies in children with CAP requiring  
300 BAL. In addition, the influence of the COVID-19 pandemic on the pathogens  
301 and the clinical manifestations in the children were analyzed.

302 We found that the positive rate of pathogen detection was 91.66%. The high  
303 etiological detection rate may be mainly attributable to our use of mRT-PCR on  
304 specimen from the foci of inflammation. The most common pathogen was *M.*  
305 *pneumoniae*, which was detected in more than four-fifths of all cases, with a  
306 remarkable over-representation among children older than 3 years of age. This  
307 proportion was higher than that reported in other studies (Lee *et al.* 45.3% in  
308 South Korea[4] and Gao *et al.* 37.5% in north China[3]. Considering that  
309 patients who required BAL in addition to intravenous medical treatment had  
310 more severe pneumonia, this difference may partly be explained by the  
311 differences in the studied populations.

312 Virus was detected in 12.51% (186/1487) of our enrolled cases. Unlike our



313 results, one or more viruses were detected in 73% of children hospitalized for  
314 CAP in the United States[21]. Furthermore, a higher percentage of children  
315 (94.3%) were reported with severe acute respiratory infection in China during  
316 the 2009 H1N1 pandemic and post-pandemic period[22]. With the differences  
317 in study sites, populations, as well as study years and duration, the proportions  
318 varied largely between studies. Of the 186 children infected with virus, AdV  
319 was the most prevalent in the present study representing 34.41% (64/186) of  
320 cases, which was in line with a study in Cameroon among children with severe  
321 acute respiratory infections[23]. However, the majority of similar studies  
322 reported RSV as the most commonly detected viral pathogen[20,21]. In the  
323 present study, RSV ranked fifth with a relatively low positive detection rate of  
324 10.22% (19/186). Co-infections were observed in nearly half of the patients  
325 (42.47%, 79/186) that tested positive for virus infection. This suggests that  
326 severe viral-related CAP is often accompanied by atypical bacterial infection.

327 The COVID-19 pandemic and the NPIs undertaken during the pandemic  
328 significantly affected the transmission of common respiratory pathogens.  
329 Compared with before the COVID-19 pandemic, the overall detection rate of  
330 viral pathogens was lower during the COVID-19 pandemic. However, the  
331 detection rate of atypical bacterial pathogens increased. The decreased  
332 detection of AdV, HRV, Flu B, Flu A and HBoV greatly contributed to the  
333 overall reduction in viral pathogens. In accordance with our results, a  
334 significant decrease in the detection of AdV, Flu B and Flu A was also

335 observed in children with a lower respiratory tract infection during the  
336 COVID-19 pandemic in southern China[5] and a considerable reduction in all  
337 viral respiratory infections was observed in a large Italian tertiary hospital[6]. In  
338 a study conducted in southern China, the detection rates of *M. pneumoniae*  
339 using nasopharyngeal swabs of inpatients with acute respiratory infection were  
340 also unprecedentedly reduced from 20% in 2019 to 1.0% in 2020[7]. However,  
341 another study using BALF from a city in northern China, showed that *M.*  
342 *pneumoniae* was the most frequently detected pathogen, at a rate of up to  
343 73.55%[24]. Furthermore, the detection of *M. pneumoniae* further increased  
344 despite the NPIs that were adopted during the COVID-19 pandemic. The main  
345 reason for this phenomenon might be the long-term colonization of *M.*  
346 *pneumoniae* in the upper respiratory tract[25].

347 In aspect to clinical manifestations, we found that children with atypical  
348 bacterial infections more frequently displayed a longer duration of fever, and a  
349 higher proportion of decreased breath sounds and rales. However, dyspnea,  
350 wheezing, diarrhea, rhonchi and chest indrawing were more frequent among  
351 children with a viral infection. Similar to other studies[26], compared with  
352 children with viral pneumonia, *M. pneumoniae*-positive children were  
353 significantly more likely to report a long duration of symptoms before  
354 hospitalization, and decreased breath sounds and rales, but were less likely to  
355 report dyspnea, wheezing, diarrhea, rhonchi and chest indrawing. Such  
356 findings may help inform clinicians of the preliminary differentiation between

357 viral and atypical bacterial infections.

358 On CT scans, consolidation and unilateral lung infiltration were often seen in  
359 the atypical bacterial infection group, whereas bilateral lung infiltration was  
360 more common in the viral infection group, suggesting that pulmonary  
361 inflammation caused by *M. pneumoniae* is relatively limited to unilateral lung  
362 tissue, while viral infection affected bilateral lung tissues in nearly half of the  
363 children. This finding was consistent with another study that compared the  
364 radiographic findings of children hospitalized for CAP with and without *M.*  
365 *pneumoniae* using data from the EPIC study[27]. FB results indicated more  
366 serious inflammatory changes in the mucosa, increasing the likelihood of this  
367 condition developing into bronchial mucus plugs and even bronchial dendritic  
368 casts in *M. pneumoniae*-infected children. The presence of bronchial mucus  
369 plugs, as detected by FB, is independently associated with a longer time  
370 period to radiographic clearance in patients with refractory *M. pneumoniae*  
371 pneumonia[28]. Wang *et al.* reported that in 86.6% of children with plastic  
372 bronchitis the causative agent was *M. pneumoniae*[29] and this result was  
373 consistent with our findings. Bronchial atresia and/or bronchiectasis of the  
374 distal airway mostly occurred in children infected with virus. Despite few  
375 articles related to bronchial lumen morphological changes during the acute  
376 stage of pneumonia, our experienced bronchoscopists found that bronchial  
377 lumen dilation can be reversed with appropriate treatment. It was unfortunate  
378 that bronchial atresia was usually not reversible. Thus, the results highlighted

379 the necessity for careful management and long-term follow-up of patients with  
380 mucus plugs, plastic bronchitis and bronchial lumen morphological changes.

381 Several studies have reported the impact of the COVID-19 pandemic on the  
382 pathogen spectrum of respiratory tract infections in children[5-7,24], but the  
383 corresponding differences in clinical manifestations have rarely been studied.  
384 During the COVID-19 pandemic, we found a decreased proportion of rhonchi,  
385 chest indrawing, bilateral lung infiltrates and bronchial lumen morphological  
386 changes, but a significantly higher proportion of decreased breath sounds,  
387 rales, consolidation, unilateral lung infiltrates and bronchial mucus plugs.  
388 Considering that the clinical manifestations of the children were consistent with  
389 a higher detection rate of *M. pneumoniae*, a possible explanation for this  
390 difference was a decrease in viral infection accompanied by an increase in *M.*  
391 *pneumoniae* infection. Therefore, wearing masks and social distancing in  
392 public places could effectively reduce the transmission of respiratory viruses,  
393 but did not reduce the infection rate of *M. pneumoniae*. Compared with before  
394 the COVID-19 pandemic, fewer children with bilateral multilobar infiltrates and  
395 pleural effusion were detected by CT scans, and mild inflammatory changes in  
396 the mucosa and decreased lumen morphological changes were detected by  
397 FB. Therefore, it is reasonable to deduce that the NPIs during the COVID-19  
398 pandemic significantly alleviated lung inflammation compared with before the  
399 pandemic.

400 Several limitations should be taken into consideration in this present study.

401 First, our study was limited to children requiring BALF and did not include  
402 children receiving medical therapy alone or in need of intensive care, and  
403 therefore does not fully represent the distribution of characteristics of all CAP  
404 pathogens. Second, although testing for common respiratory viruses and  
405 atypical bacteria, bacterial detection was restricted to the panel of organisms  
406 covered by the SureX 13 respiratory pathogen multiplex kit. This may have  
407 resulted in underestimation of the overall detection rate for pathogens. Third,  
408 due to the implementation of NPIs, our sample collection time was interrupted  
409 and were not able to identify the season-dependent changes in the occurrence  
410 of CAP caused by each etiology.

411 Despite these limitations, our study suggest that *M. pneumoniae* infection  
412 might be the greatest pediatric disease burden leading to CAP in northern  
413 China. Wearing masks and social distancing in public places can effectively  
414 reduce the transmission of respiratory viruses, but cannot reduce the infection  
415 rate of *M. pneumoniae*. In addition, the NPIs during the COVID-19 pandemic  
416 significantly reduced lung inflammation compared with before the pandemic.  
417 Our identifying changes in the pathogen spectrum and clinical characteristics  
418 might improve clinical management practices and emphasize the protective  
419 value of wearing masks and social distancing in children with  
420 Community-acquired pneumonia in children.

421 **Acknowledgments** The authors would like to thank the clinical staff,  
422 specifically the medical doctors and nurses, for their help with collecting clinical  
423 specimens, and all of the children and their parents for their participation and  
424 cooperation.

## 425 **References**

- 426 1. Perin J, Mulick A, Yeung D, Villavicencio F, Lopez G, Strong KL, et al.  
427 Global, regional, and national causes of under-5 mortality in 2000-19: An  
428 updated systematic analysis with implications for the Sustainable  
429 Development Goals. *Lancet Child Adolesc Health*. 2022;6:106-15.
- 430 2. Darby JB, Singh A, Quinonez R. Management of complicated pneumonia  
431 in childhood: A review of recent literature. *Rev Recent Clin Trials*.  
432 2017;12:253-9.
- 433 3. Gao LW, Yin J, Hu YH, Liu XY, Feng XL, He JX, et al. The epidemiology of  
434 paediatric *Mycoplasma pneumoniae* pneumonia in North China: 2006 to  
435 2016. *Epidemiol Infect*. 2019;147:e192.
- 436 4. Lee E, Kim CH, Lee YJ, Kim HB, Kim BS, Kim HY, et al. Annual and  
437 seasonal patterns in etiologies of pediatric community-acquired  
438 pneumonia due to respiratory viruses and *Mycoplasma pneumoniae*  
439 requiring hospitalization in South Korea. *Bmc Infect Dis*. 2020;20:132.
- 440 5. Liu P, Xu M, Cao L, Su L, Lu L, Dong N, et al. Impact of COVID-19  
441 pandemic on the prevalence of respiratory viruses in children with lower  
442 respiratory tract infections in China. *Virology*. 2021;18:159.
- 443 6. Vittucci AC, Piccioni L, Coltella L, Ciarlito C, Antilici L, Bozzola E, et al.  
444 The disappearance of respiratory viruses in children during the COVID-19  
445 pandemic. *Int J Environ Res Public Health*. 2021;18:9550.
- 446 7. Li L, Wang H, Liu A, Wang R, Zhi T, Zheng Y, et al. Comparison of 11

- 447 respiratory pathogens among hospitalized children before and during the  
448 COVID-19 epidemic in Shenzhen, China. *Viol J.* 2021;18:202.
- 449 8. Takashita E, Kawakami C, Momoki T, Saikusa M, Shimizu K, Ozawa H, et  
450 al. Increased risk of rhinovirus infection in children during the coronavirus  
451 disease-19 pandemic. *Influenza Other Respir Viruses.* 2021;15:488-94.
- 452 9. Agca H, Akalin H, Saglik I, Hacimustafaoglu M, Celebi S, Ener B. Changing  
453 epidemiology of influenza and other respiratory viruses in the first year of  
454 COVID-19 pandemic. *J Infect Public Health.* 2021;14:1186-90.
- 455 10. Wan WY, Thoon KC, Loo LH, Chan KS, Oon L, Ramasamy A, et al. Trends  
456 in respiratory virus infections during the COVID-19 pandemic in singapore,  
457 2020. *JAMA Netw Open.* 2021;4:e2115973.
- 458 11. Kuitunen I, Artama M, Mäkelä L, Backman K, Heiskanen-Kosma T, Renko  
459 M. Effect of social distancing due to the COVID-19 pandemic on the  
460 incidence of viral respiratory tract infections in children in finland during  
461 early 2020. *Pediatr Infect Dis J.* 2020;39:e423-7.
- 462 12. Collaborators GLRI. Estimates of the global, regional, and national  
463 morbidity, mortality, and aetiologies of lower respiratory infections in 195  
464 countries, 1990-2016: A systematic analysis for the Global Burden of  
465 Disease Study 2016. *Lancet Infect Dis.* 2018;18:1191-210.
- 466 13. Yun KW, Wallihan R, Juergensen A, Mejias A, Ramilo O.  
467 Community-Acquired pneumonia in children: Myths and facts. *Am J*  
468 *Perinatol.* 2019;36:S54-7.



- 469 14. Radhakrishnan D, Yamashita C, Gillio-Meina C, Fraser DD. Translational  
470 research in pediatrics III: Bronchoalveolar lavage. *Pediatrics*.  
471 2014;134:135-54.
- 472 15. Wang L, Zhao M, Shi Z, Feng Z, Guo W, Yang S, et al. A GeXP-Based  
473 assay for simultaneous detection of multiple viruses in hospitalized  
474 children with community acquired pneumonia. *Plos One*.  
475 2016;11:e162411.
- 476 16. Midulla F, de Blic J, Barbato A, Bush A, Eber E, Kotecha S, et al. Flexible  
477 endoscopy of paediatric airways. *Eur Respir J*. 2003;22:698-708.
- 478 17. Experts Group of Pediatric Respiratory Endoscopy, Talent Exchange  
479 Serice Center of National Health Commission Endoscopy Committee,  
480 Pediatric Section of Chinese Medical Doctor Association, Pediatric  
481 Respiratory Endoscopy Committee, Endoscopists Section of Chinese  
482 Medical Doctor Association, Pediatric Interventional Respirology Group,  
483 Maternal and Pediatric Minimally Invasive Section of Chinese Maternal and  
484 Child Health Association Bronchoscopy Collaboration Subgroup of  
485 Respirology Group, Pediatric Section of Chinese Medical Associatio.  
486 Guideline of pediatric flexible bronchoscopy in China (2018 version).  
487 *Zhong Hua Shi Yong Er Ke Lin Chuang Za Zhi*. 2018;13:983-989.
- 488 18. Chen D, Huang Y, Jiao A, Jin R, Liu X, Meng C, et al. Expert consensus on  
489 respiratory endoscopic interventional diagnosis and treatment of refractory  
490 pneumonia in Chinese children. *Zhong Hua Shi Yong Er Ke Za Zhi*.

- 491 2019;34:449-57.
- 492 19. Andronikou S, Goussard P, Sorantin E. Computed tomography in children  
493 with community-acquired pneumonia. *Pediatr Radiol*. 2017;47:1431-40.
- 494 20. Rhedin S, Lindstrand A, Hjelmgren A, Ryd-Rinder M, Ohrmalm L,  
495 Tolfvenstam T, et al. Respiratory viruses associated with  
496 community-acquired pneumonia in children: Matched case-control study.  
497 *Thorax*. 2015;70:847-53.
- 498 21. Jain S, Williams DJ, Arnold SR, Ampofo K, Bramley AM, Reed C, et al.  
499 Community-acquired pneumonia requiring hospitalization among U.S.  
500 Children. *N Engl J Med*. 2015;372:835-45.
- 501 22. Zhang C, Zhu N, Xie Z, Lu R, He B, Liu C, et al. Viral etiology and clinical  
502 profiles of children with severe acute respiratory infections in China. *Plos*  
503 *One*. 2013;8:e72606.
- 504 23. Kenmoe S, Tchendjou P, Vernet MA, Moyo-Tetang S, Mossus T,  
505 Njankouo-Ripa M, et al. Viral etiology of severe acute respiratory infections  
506 in hospitalized children in Cameroon, 2011-2013. *Influenza Other Respir*  
507 *Viruses*. 2016;10:386-93.
- 508 24. Guo W, Cui X, Wang Q, Wei Y, Guo Y, Zhang T, et al. Clinical evaluation of  
509 metagenomic next-generation sequencing for detecting pathogens in  
510 bronchoalveolar lavage fluid collected from children with  
511 community-acquired pneumonia. *Front Med (Lausanne)*. 2022;9:952636.
- 512 25. Spuesens EB, Fraaij PL, Visser EG, Hoogenboezem T, Hop WC, van

- 513 Adrichem LN, et al. Carriage of *Mycoplasma pneumoniae* in the upper  
514 respiratory tract of symptomatic and asymptomatic children: An  
515 observational study. *Plos Med*. 2013;10:e1001444.
- 516 26. Li YT, Liang Y, Ling YS, Duan MQ, Pan L, Chen ZG. The spectrum of viral  
517 pathogens in children with severe acute lower respiratory tract infection:  
518 A 3-year prospective study in the pediatric intensive care unit. *J Med Virol*.  
519 2019;91:1633-42.
- 520 27. Kutty PK, Jain S, Taylor TH, Bramley AM, Diaz MH, Ampofo K, et al.  
521 *Mycoplasma pneumoniae* Among Children Hospitalized with  
522 Community-acquired Pneumonia. *Clin Infect Dis*. 2019;68:5-12.
- 523 28. Huang L, Huang X, Jiang W, Zhang R, Yan Y, Huang L. Independent  
524 predictors for longer radiographic resolution in patients with refractory  
525 *Mycoplasma pneumoniae* pneumonia: A prospective cohort study. *Bmj*  
526 *Open*. 2018;8:e23719.
- 527 29. Wang L, Wang W, Sun JM, Ni SW, Ding JL, Zhu YL, et al. Efficacy of  
528 fiberoptic bronchoscopy and bronchoalveolar lavage in childhood-onset,  
529 complicated plastic bronchitis. *Pediatr Pulmonol*. 2020;55:3088-95.
